# Supplementary material for: A Dynamic Mechanistic Model of Perceptual Binding
Source: MDPI journal article supplement (doi:10.3390/math10071135), 2022-04-01
Supplement: s1 [file s1]

Archive with 1 entries (1 files):
- mathematics-1631624-supplementary.pdf
