# Supplementary material for: A Dynamic Mechanistic Model of Perceptual Binding
Source: MDPI journal article supplement (doi:10.3390/math10071135), 2022-04-01
Supplement: s1 [file s1 › mathematics-1631624-supplementary.pdf]

**Supplementary Materials:** The following supporting information can be downloaded at: [www.mdpi.com/xxx/s1](http://www.mdpi.com/xxx/s1).

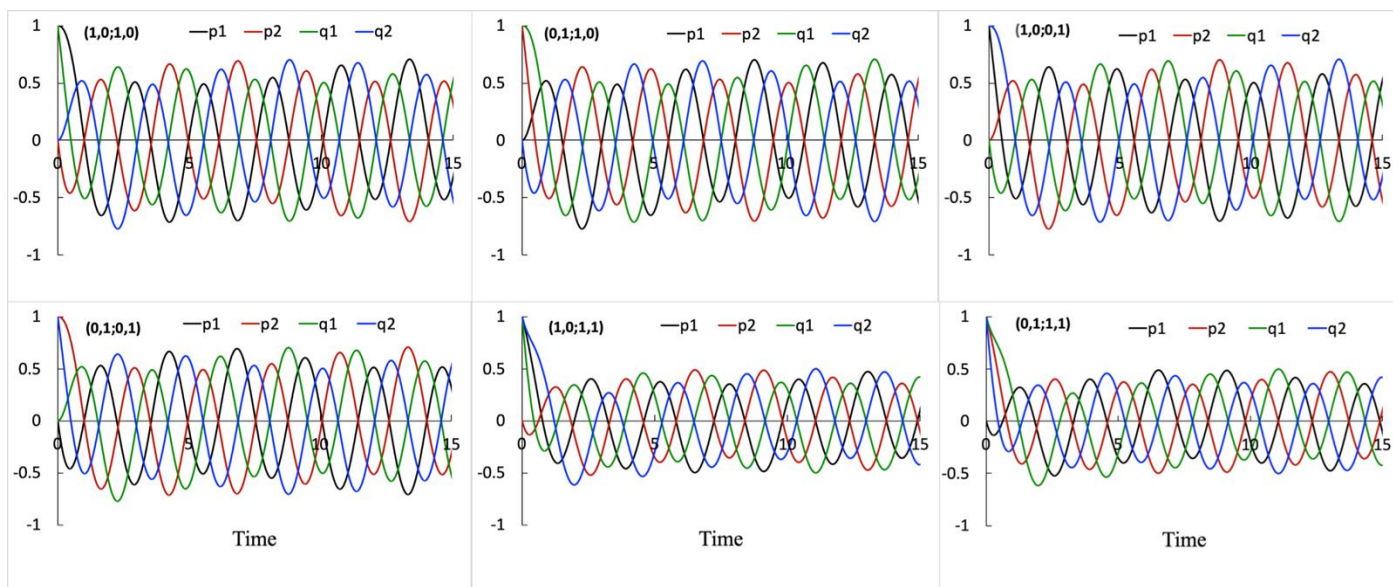

Figure S1. Dynamic relationships among processes depending on the initial conditions. Simulations are obtained using the interaction scheme shown in Figure 1b and the following parameter values:  $\varepsilon = -1$ ,  $\alpha = -1$ .
